# Supplementary material for: lncRNA LCPAT1 Upregulation Promotes Breast Cancer Progression via Enhancing MFAP2 Transcription
Source: PubMed Central journal article supplement — Mol Ther Nucleic Acids. 2020 Jul 10;21:804–13. doi: 10.1016/j.omtn.2020.07.015 (PMC7424176; doi:10.1016/j.omtn.2020.07.015), 2020-07-10
Supplement: mmc1.pdf [file mmc1.pdf]

**OMTN, Volume 21**

**Supplemental Information**

**lncRNA LCPAT1 Upregulation**

**Promotes Breast Cancer Progression**

**via Enhancing MFAP2 Transcription**

**Xue Gong, Tuozhou Dong, Ming Niu, Xiaoshuan Liang, Shanshan Sun, Youxue Zhang, Yue Li, and Dalin Li**

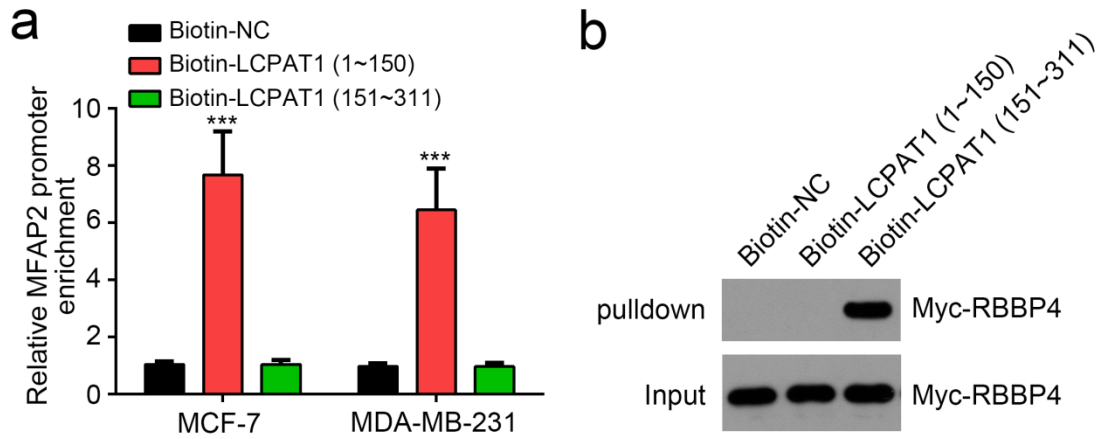

**Supplementary Fig. 1.** LCPAT1 interacts with MFAP2 promoter and RBBP4. (a) Pull-down assay using biotin-labeled LCPAT1 fragment and cell lysates for detection of the interaction between LCPAT1 and MFAP2 promoter. (b) Pull-down assay using biotin-labeled LCPAT1 fragment and Myc-RBBP4 overexpressing cell lysates, followed by Western blotting. \*\*\* $P < 0.001$ .

**Supplementary Table 1. Genomic locations of neighboring genes.**

| Gene             | Genomic location                |
|------------------|---------------------------------|
| <i>LCPAT1</i>    | Chromosome 1: 17406760-17407382 |
| <i>MFAP2</i>     | Chromosome 1: 16974502-16981586 |
| <i>ATP13A2</i>   | Chromosome 1: 16985958-17011928 |
| <i>SDHB</i>      | Chromosome 1: 17018722-17054032 |
| <i>PADI2</i>     | Chromosome 1: 17066761-17119453 |
| <i>PADI1</i>     | Chromosome 1: 17205125-17246007 |
| <i>PADI3</i>     | Chromosome 1: 17249079-17284233 |
| <i>PADI4</i>     | Chromosome 1: 17308195-17364004 |
| <i>PADI6</i>     | Chromosome 1: 17372196-17401699 |
| <i>RCC2</i>      | Chromosome 1: 17406760-17439677 |
| <i>ARHGEF10L</i> | Chromosome 1: 17513442-17697875 |
